# Supplementary material for: Transversus Abdominis Plane Block as a Strategy for Effective Pain Management in Patients with Pain during Laparoscopic Cholecystectomy: A Systematic Review
Source: MDPI journal article supplement (doi:10.3390/jcm11236896), 2022-11-22
Supplement: s1 [file s1]

**Table S1.** Within Group Effects of the Interventions.

| No | Authors          | Year | Sample Size (n) | Time    | Baseline M(SD) | Intraoperative M(SD)                                   | Post-Operative M(SD) | Mean Analgesia Demand per Group | Level of Significance |
|----|------------------|------|-----------------|---------|----------------|--------------------------------------------------------|----------------------|---------------------------------|-----------------------|
| 1  | El-Dawlatly [59] | 2009 | 21              | 24 h    |                | 0.9(0.7)                                               | 10.5(7.7)            | 9.6                             | <0.05 *               |
|    |                  |      |                 |         |                | 8.6(3.5)                                               |                      |                                 | <0.01 *               |
|    |                  |      |                 |         |                | 2.3(1.0)                                               | 22.8(4.3)            | 20.5                            | <0.05 *               |
|    |                  |      |                 |         |                | 23.0(4.8)                                              |                      |                                 | <0.01 *               |
| 2  | Ra [7]           | 2010 | 18              | 20 min  |                |                                                        | 3.3(1.84)            | -1.2                            | <0.001 *              |
|    |                  |      |                 | 30 min  |                |                                                        | 2.9(1.68)            | -0.8                            |                       |
|    |                  |      |                 | 60 min  |                |                                                        | 2.8(1.70)            | -0.7                            |                       |
|    |                  |      |                 | 6 h     |                |                                                        | 3.1(1.55)            | -1.0                            |                       |
|    |                  |      |                 | 12 h    |                |                                                        | 2.1(1.41)            |                                 |                       |
|    |                  |      |                 | 24 h    |                |                                                        | 1.6(1.46)            |                                 |                       |
|    |                  |      | 18              | 20 min  |                |                                                        | 3.2(1.89)            | -1.4                            | <0.001 *              |
|    |                  |      |                 | 30 min  |                |                                                        | 2.8(1.38)            | -1.0                            |                       |
|    |                  |      |                 | 60 min  |                |                                                        | 2.6(1.46)            | -0.8                            |                       |
|    |                  |      |                 | 6 h     |                |                                                        | 1.9(1.43)            | -0.1                            |                       |
|    |                  |      |                 | 12 h    |                |                                                        | 1.8(1.16)            |                                 |                       |
|    |                  |      |                 | 24 h    |                |                                                        | 1.3(0.97)            |                                 |                       |
|    |                  |      | 18              | 20 min  |                |                                                        | 8.6(1.76)            | -4.2                            | <0.001 *              |
|    |                  |      |                 | 30 min  |                |                                                        | 8.2(1.72)            | -3.8                            | <0.001 *              |
|    |                  |      |                 | 60 min  |                |                                                        | 6.9(1.57)            | -2.5                            | <0.001 *              |
|    |                  |      |                 | 6 h     |                |                                                        | 6.1(1.98)            | -1.7                            | <0.001 *              |
|    |                  |      |                 | 12 h    |                |                                                        | 5.1(2.01)            | -0.7                            | <0.001 *              |
|    |                  |      |                 | 24 h    |                |                                                        | 4.4(1.68)            |                                 | <0.001 *              |
| 3  | Ortiz [20]       | 2012 | 39              | 24 h    | 1.5(1.8)       |                                                        | 16.1(9.9)            | 14.6                            | 0.75                  |
|    |                  |      |                 | 24 h    |                | 5.0(3.5)                                               | 16.1(9.9)            | 11.1                            |                       |
|    |                  |      |                 |         |                | 237(82)                                                |                      |                                 | 0.67                  |
|    |                  |      |                 | 24 h    |                |                                                        | 1.8(1.6)             |                                 |                       |
|    |                  |      | 35              | 24 h    | 0.9(2.0)       |                                                        | 15.4(9.2)            | 14.5                            | 0.75                  |
|    |                  |      |                 |         |                | 5.0(3.5)                                               | 15.4(9.2)            | 10.4                            |                       |
|    |                  |      |                 | 24 h    |                | 5.8(2.8)                                               | 15.4(9.2)            | 9.6                             |                       |
|    |                  |      |                 |         |                | 245(75)                                                |                      |                                 | 0.67                  |
|    |                  |      |                 | 24 h    |                |                                                        | 1.8(1.8)             |                                 |                       |
| 4  | Petersen [21]    | 2012 |                 | 24 h    |                | Ketomidone consumption $p = 0.41$ , 95% CI: 0.13, 0.65 |                      |                                 |                       |
|    |                  |      |                 | 0-2 h   |                | 5mg                                                    |                      |                                 |                       |
|    |                  |      |                 |         |                | Ketomidone consumption $p = 0.68$ , 95% CI: 0.45, 0.83 |                      |                                 |                       |
|    |                  |      |                 | 0-2 h   |                | 7.5mg                                                  |                      |                                 |                       |
|    |                  |      |                 | 1 & 4 h |                |                                                        |                      |                                 |                       |
| 5  | Tolchard [60]    | 2012 | 21              |         |                | 0.58(0.47)                                             |                      |                                 | 0.5                   |
|    |                  |      |                 |         |                | 2.2(0.94)                                              |                      |                                 | 0.56                  |
|    |                  |      |                 |         |                | 3.0(0.94)                                              |                      |                                 | 0.85                  |
|    |                  |      |                 |         |                | 0.65(0.19)                                             |                      |                                 | 0.18                  |
|    |                  |      |                 |         |                | 16(7.0)                                                |                      |                                 | 0.61                  |
|    |                  |      |                 |         |                | 1.1(0.47)                                              |                      |                                 |                       |
|    |                  |      | 22              |         |                | 0.65(0.46)                                             |                      |                                 | 0.5                   |
|    |                  |      |                 |         |                | 2.4(0.92)                                              |                      |                                 | 0.56                  |
|    |                  |      |                 |         |                | 3.1(1.4)                                               |                      |                                 | 0.85                  |
|    |                  |      |                 |         |                |                                                        |                      |                                 |                       |

|   |                            |      |                            |            |       |
|---|----------------------------|------|----------------------------|------------|-------|
|   |                            |      |                            | 0.7(3.2)   | 0.18  |
|   |                            |      |                            | 21(9.2)    | 0.61  |
|   |                            |      |                            | 1.2(0.46)  |       |
| 6 | Bhatia [6]                 | 2014 |                            |            |       |
|   | US-TAP Block,<br>Posterior | 21   |                            |            |       |
|   |                            |      | 0 h                        | 1.2(1.1)   | -0.4  |
|   |                            |      | 2 h                        | 1.6(1.5)   | -0.8  |
|   |                            |      | 4 h                        | 1.8(1.2)   | -1.0  |
|   |                            |      | 6 h                        | 1.6(1.3)   | -0.8  |
|   |                            |      | 8 h                        | 2.2(1.8)   | -1.4  |
|   |                            |      | 12 h                       | 1.8(2.0)   | -1.0  |
|   |                            |      | 24 h                       | 0.8(0.8)   |       |
|   | US-TAP Block,<br>Subcostal | 21   |                            |            |       |
|   |                            |      | 0 h                        | 0.85(0.87) | -0.7  |
|   |                            |      | 2 h                        | 0.8(0.89)  | -0.65 |
|   |                            |      | 4 h                        | 0.8(1.2)   | -0.65 |
|   |                            |      | 6 h                        | 0.9(1.1)   | -0.75 |
|   |                            |      | 8 h                        | 1.0(1.5)   | -0.85 |
|   |                            |      | 12 h                       | 0.8(1.5)   | -0.65 |
|   |                            |      | 24 h                       | 0.15(0.36) |       |
|   | Control (GA<br>only)       | 22   |                            |            |       |
|   |                            |      | 0 h                        | 2.35(1.3)  | -1.0  |
|   |                            |      | 2 h                        | 3.0(1.3)   | -1.7  |
|   |                            |      | 4 h                        | 2.3(0.9)   | -1.0  |
|   |                            |      | 6 h                        | 2.0(1.1)   | -0.7  |
|   |                            |      | 8 h                        | 2.6(1.7)   | -1.3  |
|   |                            |      | 12 h                       | 1.9(1.5)   | -0.6  |
|   |                            |      | 24 h                       | 1.3(1.0)   |       |
| 7 | Shin [61]                  | 2014 |                            |            |       |
|   | US-TAP-Block               | 15   | 8.0(13.7)                  | 8.0(13.7)  | 0.415 |
|   |                            |      | 72.4(4.6)                  | 10.0(15.8) | -62.4 |
|   |                            |      |                            | 7.3(7.0)   | 0.852 |
|   |                            |      | VNRS Scores at rest        |            |       |
|   |                            |      | 10 min                     | 4.3(0.5)   | -2.2  |
|   |                            |      | 30 min                     | 3.5(0.4)   | -1.4  |
|   |                            |      | 1 h                        | 3.5(0.4)   | -1.4  |
|   |                            |      | 3 h                        | 3.3(0.3)   | -1.2  |
|   |                            |      | 6 h                        | 3.6(0.3)   | -1.5  |
|   |                            |      | 24 h                       | 2.1(0.2)   |       |
|   |                            |      | VNRS scores while coughing |            |       |
|   |                            |      | 10 min                     | 4.7(0.6)   | -1.8  |
|   |                            |      | 30 min                     | 4.5(0.5)   | -1.6  |
|   |                            |      | 1 h                        | 4.5(0.5)   | -1.6  |
|   |                            |      | 3 h                        | 4.4(0.4)   | -1.5  |
|   |                            |      | 6 h                        | 4.7(0.4)   | -1.8  |
|   |                            |      | 24 h                       | 2.9(0.2)   |       |
|   | US-OSTAP                   | 15   | 8.0(13.7)                  |            | 0.415 |
|   |                            |      | 78.1(4.6)                  | 6.7(11.4)  | -71.4 |
|   |                            |      |                            | 8.0(7.7)   | 0.852 |
|   |                            |      | VNRS Scores at rest        |            |       |
|   |                            |      | 10 min                     | 2.3(0.5)   | -1.0  |
|   |                            |      | 30 min                     | 2.8(0.6)   | -1.5  |
|   |                            |      | 1 h                        | 2.1(0.4)   | -0.8  |
|   |                            |      | 3 h                        | 2.0(0.3)   | -0.7  |
|   |                            |      | 6 h                        | 2.3(0.3)   | -1.0  |
|   |                            |      | 24 h                       | 1.3(0.2)   |       |
|   |                            |      | VNRS scores while coughing |            |       |
|   |                            |      | 10 min                     | 2.9(0.6)   | -0.8  |
|   |                            |      | 30 min                     | 3.3(0.6)   | -1.2  |
|   |                            |      | 1 h                        | 2.7(0.4)   | -0.6  |
|   |                            |      | 3 h                        | 2.7(0.3)   | -0.6  |
|   |                            |      | 6 h                        | 3.2(0.3)   | -1.1  |
|   |                            |      | 24 h                       | 2.1(0.2)   |       |
|   | Control (GA<br>only)       | 15   | 14.0(5.5)                  |            | 0.415 |
|   |                            |      | 82.9(4.4)                  | 41.7(37.4) | -41.2 |
|   |                            |      |                            | 6.7(8.2)   | 0.852 |
|   |                            |      | VNRS Scores at rest        |            |       |
|   |                            |      | 10 min                     | 6.6(0.5)   | -4.5  |
|   |                            |      | 30 min                     | 6.3(0.5)   | -4.2  |

|    |                                                                  |      |                                                                                                                                                                                                                                                                                                                             |                                |                  |       |          |
|----|------------------------------------------------------------------|------|-----------------------------------------------------------------------------------------------------------------------------------------------------------------------------------------------------------------------------------------------------------------------------------------------------------------------------|--------------------------------|------------------|-------|----------|
|    |                                                                  |      | 1 h                                                                                                                                                                                                                                                                                                                         |                                | 5.1(0.3)         | -3.0  | 0.001 *  |
|    |                                                                  |      | 3 h                                                                                                                                                                                                                                                                                                                         |                                | 3.7(0.5)         | -1.6  | 0.002 *  |
|    |                                                                  |      | 6 h                                                                                                                                                                                                                                                                                                                         |                                | 3.3(0.3)         | -1.2  | 0.009 *  |
|    |                                                                  |      | 24 h                                                                                                                                                                                                                                                                                                                        |                                | 2.1(0.4)         |       | 0.014 *  |
|    |                                                                  |      | VNRS scores while coughing                                                                                                                                                                                                                                                                                                  |                                |                  |       |          |
|    |                                                                  |      | 10 min                                                                                                                                                                                                                                                                                                                      |                                | 7.5(0.5)         | -4.5  | 0.001 *  |
|    |                                                                  |      | 30 min                                                                                                                                                                                                                                                                                                                      |                                | 7.4(0.5)         | -4.4  | 0.001 *  |
|    |                                                                  |      | 1 h                                                                                                                                                                                                                                                                                                                         |                                | 6.4(0.4)         | -3.4  | 0.001 *  |
|    |                                                                  |      | 3 h                                                                                                                                                                                                                                                                                                                         |                                | 4.7(0.5)         | -1.7  | 0.001 *  |
|    |                                                                  |      | 6 h                                                                                                                                                                                                                                                                                                                         |                                | 4.3(0.4)         | -1.3  | 0.003 *  |
|    |                                                                  |      | 24 h                                                                                                                                                                                                                                                                                                                        |                                | 3.0(0.4)         |       | 0.020 *  |
| 8  | Basaran [62]                                                     | 2015 |                                                                                                                                                                                                                                                                                                                             |                                |                  |       |          |
|    | US-OSTAP-Block Group                                             | 38   |                                                                                                                                                                                                                                                                                                                             |                                |                  |       |          |
|    |                                                                  |      |                                                                                                                                                                                                                                                                                                                             |                                | 19.4(47.6)       |       | 0.437    |
|    |                                                                  |      |                                                                                                                                                                                                                                                                                                                             |                                | 0.26(1.6)        |       | 0.48     |
|    |                                                                  |      | 0-2h                                                                                                                                                                                                                                                                                                                        |                                | 31.6(31.7)       |       | 0.001 *  |
|    |                                                                  |      | 2-24 h                                                                                                                                                                                                                                                                                                                      |                                | 126.3(54.2)      |       | 0.001 *  |
|    |                                                                  |      | 0-24 h                                                                                                                                                                                                                                                                                                                      |                                | 2.3(3.7)         |       | 0.719    |
|    | Control (GA only)                                                | 38   |                                                                                                                                                                                                                                                                                                                             |                                |                  |       |          |
|    |                                                                  |      |                                                                                                                                                                                                                                                                                                                             |                                | 19.4(47.6)       |       | 0.437    |
|    |                                                                  |      |                                                                                                                                                                                                                                                                                                                             |                                | 0.26(1.6)        |       | 0.48     |
|    |                                                                  |      | 0-2 h                                                                                                                                                                                                                                                                                                                       |                                | 80.3(50.1)       |       | 0.001 *  |
|    |                                                                  |      | 2-24 h                                                                                                                                                                                                                                                                                                                      |                                | 267.1(108.6)     |       | 0.001 *  |
|    |                                                                  |      | 0-24 h                                                                                                                                                                                                                                                                                                                      |                                | 3.3(5.5)         |       | 0.719    |
| 9  | Elamin [63]                                                      | 2015 |                                                                                                                                                                                                                                                                                                                             |                                |                  |       |          |
|    | LAP-TAP Block with Bupivacaine plus Periportal saline injection. | 40   | In the LAP-TAP group (Bupivacaine + Periportal saline injection), numerical pain assessment scores were significantly decreased after 1, 3 and 6 h of rest ( $p = 0.025$ , $p = 0.03$ , and $p = 0.007$ , respectively).                                                                                                    |                                |                  |       |          |
|    | LAP-TAP Block with saline plus Periportal Bupivacaine injection. | 40   | In the LAP-TAP group (Bupivacaine + Periportal saline injection), numerical pain assessment scores were significantly decreased after 1, 3 and 6 h of rest ( $p = 0.025$ , $p = 0.03$ , and $p = 0.007$ , respectively).                                                                                                    |                                |                  |       |          |
| 10 | Saliminia [64]                                                   | 2015 |                                                                                                                                                                                                                                                                                                                             | Time of first Fentanyl request |                  |       |          |
|    | US-TAP Block with Bupivacaine + Normal saline                    | 18   | 24 h usage                                                                                                                                                                                                                                                                                                                  | 144.44 (83.1)                  | 566.7 (367.8)    | 422.3 | 0.019 *  |
|    | US-TAP Block (Bupivacaine + Sufentanil)                          | 18   | 24 h usage                                                                                                                                                                                                                                                                                                                  | 206.38 (112.7)                 | 555.5 (356.8)    | 349.1 | 0.002 *  |
|    | US-TAP Block (normal saline)                                     | 18   | 24 h usage                                                                                                                                                                                                                                                                                                                  | 79.44 (42.2)                   | 877.8(338.8)     | 978.4 | 0.012 *  |
| 11 | Al-refaey [65]                                                   | 2016 |                                                                                                                                                                                                                                                                                                                             |                                |                  |       |          |
|    | US-TAP Block with Bupivacaine                                    | 30   | Post-operative day 1                                                                                                                                                                                                                                                                                                        |                                | 2.1(0.5)         |       | <0.001 * |
|    |                                                                  |      |                                                                                                                                                                                                                                                                                                                             |                                | 0.5± 0.1mg       |       | <0.011 * |
|    | US-TAP Block with Bupivacaine + magnesium                        | 30   |                                                                                                                                                                                                                                                                                                                             |                                | 2.2(0.5)         |       | <0.001 * |
|    |                                                                  |      |                                                                                                                                                                                                                                                                                                                             |                                | 2.1± 0.1mg       |       | <0.011 * |
|    | Control (GA only)                                                | 30   |                                                                                                                                                                                                                                                                                                                             |                                | 2.8(0.6)         |       | <0.001 * |
|    |                                                                  |      |                                                                                                                                                                                                                                                                                                                             |                                | 0.9± 0.1mg       |       | <0.011 * |
| 12 | Bava [66]                                                        | 2016 | A total of 8 patients in the US-TAP group and 16 patients in the local infiltration group required additional Fentanyl intraoperatively ( $p = 0.028$ ). In the immediate postoperative period, local infiltration levels were significantly higher at rest and during cough ( $p = 0.034$ and $p = 0.007$ , respectively). |                                |                  |       |          |
|    |                                                                  |      | Median (minimum-maximum)                                                                                                                                                                                                                                                                                                    |                                |                  |       |          |
|    | US-TAP Block                                                     | 21   | 0 h                                                                                                                                                                                                                                                                                                                         |                                | 5.0(0-8)         |       | 0.034 *  |
|    |                                                                  |      | 1 h                                                                                                                                                                                                                                                                                                                         |                                | 3.0 (2-7)        |       | 0.209    |
|    |                                                                  |      | 2 h                                                                                                                                                                                                                                                                                                                         |                                | 2.0(0-5)         |       | 0.579    |
|    |                                                                  |      | 4 h                                                                                                                                                                                                                                                                                                                         |                                | 2.0 (0-3)        |       | 0.864    |
|    |                                                                  |      | 6 h                                                                                                                                                                                                                                                                                                                         |                                | 2.0(0-5)         |       | 0.528    |
|    |                                                                  |      | 12 h                                                                                                                                                                                                                                                                                                                        |                                | 1.0(0-5)         |       | 0.176    |
|    |                                                                  |      | 24 h                                                                                                                                                                                                                                                                                                                        |                                | 2.0 (0-5)        |       | 0.01 *   |
|    |                                                                  |      |                                                                                                                                                                                                                                                                                                                             |                                | 34.57 x 14.64 mg |       | 0.688    |
|    | Control (Port Sites infiltration)                                | 21   | 0 h                                                                                                                                                                                                                                                                                                                         |                                | 7.0 (2-8)        |       | 0.034 *  |

|    |                                             |      |        |                                                                                                       |         |
|----|---------------------------------------------|------|--------|-------------------------------------------------------------------------------------------------------|---------|
|    |                                             |      | 1 h    | 2.0 (0–8)                                                                                             | 0.209   |
|    |                                             |      | 2 h    | 2.0 (0–6)                                                                                             | 0.579   |
|    |                                             |      | 4 h    | 2.0 (0–7)                                                                                             | 0.864   |
|    |                                             |      | 6 h    | 1.0 (0–5)                                                                                             | 0.528   |
|    |                                             |      | 12 h   | 2.0 (0–6)                                                                                             | 0.176   |
|    |                                             |      | 24 h   | 0.5 (0–5)                                                                                             | 0.01 *  |
|    |                                             |      |        | 32.76 x 14.34 mg                                                                                      | 0.688   |
| 13 | Huang [67]                                  | 2016 |        |                                                                                                       |         |
|    | US-TAP Block                                | 20   | 0      | 2.8(1.3) *                                                                                            | -1.1    |
|    |                                             |      | 30 min | 2.6(1.4) *                                                                                            | -0.9    |
|    |                                             |      | 60 min | 2.5(1.3) *                                                                                            | -0.8    |
|    |                                             |      | 6 h    | 2.9(1.5) *                                                                                            | -1.2    |
|    |                                             |      | 12 h   | 2.3(1.5) *                                                                                            | -0.6    |
|    |                                             |      | 24 h   | 1.7(1.3) *                                                                                            |         |
|    | US-TAP Block +<br>Dexamethasone             | 20   | 0      | 2.6(1.2) *                                                                                            | -1.1    |
|    |                                             |      | 30 min | 2.7(1.4) *                                                                                            | -1.2    |
|    |                                             |      | 60 min | 2.5(1.3) *                                                                                            | -1.0    |
|    |                                             |      | 6 h    | 2.6(1.4) *                                                                                            | -1.1    |
|    |                                             |      | 12 h   | 1.9(1.2) *                                                                                            | -0.4    |
|    |                                             |      | 24 h   | 1.5(1.1) *                                                                                            |         |
|    | Control (GA)                                | 20   | 0      | 8.5(1.6)                                                                                              | -4.3    |
|    |                                             |      | 30 min | 6.5(1.1)                                                                                              | -2.3    |
|    |                                             |      | 60 min | 6.5(1.5)                                                                                              | -2.3    |
|    |                                             |      | 6 h    | 6.3(1.4)                                                                                              | -2.1    |
|    |                                             |      | 12 h   | 5.6(1.6)                                                                                              | -1.4    |
|    |                                             |      | 24 h   | 4.2(1.4)                                                                                              |         |
| 14 | Oksar [68]                                  | 2016 |        |                                                                                                       |         |
|    | Intercostal-iliac<br>US-TAP Block           | 22   |        | 11(55%) do not require<br>additional analgesics;<br>9(45%) require addi-<br>tional analgesics.        |         |
|    | US-OSTAP Block                              | 22   |        | 17(85%) do not require<br>additional analgesics;<br>3(15%) require addi-<br>tional analgesics.        |         |
|    | Control (GA +<br>PCA only)                  | 22   |        | 7(35%) do not require<br>additional analgesics;<br>13(65%) require addi-<br>tional analgesics.        |         |
| 15 | Sinha [69]                                  | 2016 |        | Median IQR                                                                                            |         |
|    | US-TAP Block<br>with 0.25% Bupi-<br>vacaine | 30   | 10 min | 0.00(0.00–0.00)                                                                                       | 0.044 * |
|    |                                             |      | 30 min | 1.00(0.00–1.00)                                                                                       | 0.003 * |
|    |                                             |      | 1 h    | 1.50(0.75–2.25)                                                                                       | 0.020 * |
|    |                                             |      | 4 h    | 2.00(1.00–5.00)                                                                                       | 0.441   |
|    |                                             |      | 8 h    | 2.00(1.00–2.00)                                                                                       | 0.164   |
|    |                                             |      | 12 h   | 1.50(1.00–2.00)                                                                                       | 0.803   |
|    |                                             |      | 24 h   | 1.00(1.00–2.00)                                                                                       | 1.000   |
|    | US-TAP Block<br>with 0.375%<br>Ropivacaine  | 30   | 10 min | 0.00(0.00–0.00)                                                                                       | 0.044 * |
|    |                                             |      | 30 min | 0.00(0.00–0.00)                                                                                       | 0.003 * |
|    |                                             |      | 1 h    | 0.00(0.00–2.00)                                                                                       | 0.020 * |
|    |                                             |      | 4 h    | 2.00(1.00–4.00)                                                                                       | 0.441   |
|    |                                             |      | 8 h    | 2.00(1.00–4.25)                                                                                       | 0.164   |
|    |                                             |      | 12 h   | 0.00(0.00–2.00)                                                                                       | 0.803   |
|    |                                             |      | 24 h   | 1.00(1.00–2.00)                                                                                       | 1.000   |
| 16 | Breazu [70]                                 | 2017 |        | Pain score at rest: Results presented as median (25 <sup>th</sup> to 75 <sup>th</sup> percentile)     |         |
|    | US-OSTAP (Bu-<br>pivacaine)                 |      | 0 h    | 3(2–4)                                                                                                |         |
|    |                                             |      | 2 h    | 3(3–4)                                                                                                |         |
|    |                                             |      | 4 h    | 4(3–4)                                                                                                |         |
|    |                                             |      | 6 h    | 2(2–3)                                                                                                |         |
|    |                                             |      | 12 h   | 2(1–2)                                                                                                |         |
|    |                                             |      | 24 h   | 1(1–2)                                                                                                |         |
|    |                                             |      |        | Pain score in movement: Results presented as median (25 <sup>th</sup> to 75 <sup>th</sup> percentile) |         |
|    |                                             |      | 0 h    | 1(1–2)                                                                                                |         |
|    |                                             |      | 2 h    | 1(1–3)                                                                                                |         |
|    |                                             |      | 4 h    | 1(1–2)                                                                                                |         |
|    |                                             |      | 6 h    | 1(0–1)                                                                                                |         |
|    |                                             |      | 12 h   | 0(0–1)                                                                                                |         |
|    |                                             |      | 24 h   | 0(0–1)                                                                                                |         |

|    |                                                              |      |                                                                                                       |              |          |
|----|--------------------------------------------------------------|------|-------------------------------------------------------------------------------------------------------|--------------|----------|
|    |                                                              |      | 24 h                                                                                                  | 160(140–180) |          |
|    |                                                              |      | 24 h                                                                                                  | 34.8(26.94)  |          |
|    | US-OSTAP (Peth-<br>idine)                                    |      | Pain score at rest: Results presented as median (25 <sup>th</sup> to 75 <sup>th</sup> percentile)     |              |          |
|    |                                                              |      | 0 h                                                                                                   | 1(1–2)       |          |
|    |                                                              |      | 2 h                                                                                                   | 1(1–2)       |          |
|    |                                                              |      | 4 h                                                                                                   | 1(1.2)       |          |
|    |                                                              |      | 6 h                                                                                                   | 1(0–1)       |          |
|    |                                                              |      | 12 h                                                                                                  | 0(0–1)       |          |
|    |                                                              |      | 24 h                                                                                                  | 0(0–0)       |          |
|    |                                                              |      | Pain score in movement: Results presented as median (25 <sup>th</sup> to 75 <sup>th</sup> percentile) |              |          |
|    |                                                              |      | 0 h                                                                                                   | 0(0–1)       |          |
|    |                                                              |      | 2 h                                                                                                   | 1(1–2)       |          |
|    |                                                              |      | 4 h                                                                                                   | 1(1–2)       |          |
|    |                                                              |      | 6 h                                                                                                   | 1(0–1)       |          |
|    |                                                              |      | 12 h                                                                                                  | 0(0–1)       |          |
|    |                                                              |      | 24 h                                                                                                  | 0(0–0)       |          |
|    |                                                              |      | 24 h                                                                                                  | 150(140–180) | <0.001   |
|    |                                                              |      | 24 h                                                                                                  | 20.4(20.71)  |          |
|    | US-OSTAP-Block<br>(Normal saline)                            |      | Pain score at rest: Results presented as median (25 <sup>th</sup> to 75 <sup>th</sup> percentile)     |              |          |
|    |                                                              |      | 0 h                                                                                                   | 0(0–1)       |          |
|    |                                                              |      | 2 h                                                                                                   | 1(1–2)       |          |
|    |                                                              |      | 4 h                                                                                                   | 1(1–2)       |          |
|    |                                                              |      | 6 h                                                                                                   | 1(0–1)       |          |
|    |                                                              |      | 12 h                                                                                                  | 0(0–1)       |          |
|    |                                                              |      | 24 h                                                                                                  | 0(0–0)       |          |
|    |                                                              |      | Pain score in movement: Results presented as median (25 <sup>th</sup> to 75 <sup>th</sup> percentile) |              |          |
|    |                                                              |      | 0 h                                                                                                   | 3(2–4)       |          |
|    |                                                              |      | 2 h                                                                                                   | 3(3–4)       |          |
|    |                                                              |      | 4 h                                                                                                   | 4(3–5)       |          |
|    |                                                              |      | 6 h                                                                                                   | 2(2–3)       |          |
|    |                                                              |      | 12 h                                                                                                  | 2(1–2)       |          |
|    |                                                              |      | 24 h                                                                                                  | 1(1–2)       |          |
|    |                                                              |      | 24 h                                                                                                  | 400(320–340) |          |
|    |                                                              |      | 24 h                                                                                                  | 78(17.32)    |          |
| 17 | Choi [71]                                                    | 2017 | Number of patients requiring additional analgesics                                                    |              |          |
|    | US-TAP block<br>(Inserted in-<br>dwelling cathe-<br>ter)     | 34   |                                                                                                       |              |          |
|    |                                                              |      |                                                                                                       | 4(11.8%)     | 0.114    |
|    |                                                              |      |                                                                                                       | 17(50.0%)    | 0.332    |
|    | US-TAP block +<br>PCA                                        | 34   |                                                                                                       |              |          |
|    |                                                              |      |                                                                                                       | 2(5.9%)      | 0.114    |
|    |                                                              |      |                                                                                                       | 11(32.4%)    | 0.332    |
|    | Control (PCA)                                                | 35   |                                                                                                       |              |          |
|    |                                                              |      |                                                                                                       | 0(0.0%)      | 0.114    |
|    |                                                              |      |                                                                                                       | 15(42.9%)    | 0.332    |
| 18 | Sahin [72]                                                   | 2017 | Results presented as median (range)                                                                   |              |          |
|    | US-TAP Block<br>(Bupivacaine +<br>10mls normal sa-<br>line). | 30   |                                                                                                       |              |          |
|    |                                                              |      | 20 min                                                                                                | 2.0(0–8)     | 0.014 *  |
|    |                                                              |      | 12 h                                                                                                  | 2.5(0–7)     | 0.003 *  |
|    |                                                              |      | 24 h                                                                                                  | 3.0(1–7)     | <0.001 * |
|    | US-TAP Block<br>(20mls normal<br>saline)                     | 30   |                                                                                                       |              |          |
|    |                                                              |      | 20 min                                                                                                | 2.0(0–4)     | 0.014 *  |
|    |                                                              |      | 12 h                                                                                                  | 1.0(0–4)     | 0.003 *  |
|    |                                                              |      | 24 h                                                                                                  | 1.0(0–4)     | <0.001 * |
| 19 | Baral [73]                                                   | 2018 |                                                                                                       |              |          |
|    | US-TAP, subcos-<br>tal                                       | 30   |                                                                                                       |              |          |
|    |                                                              |      | 24 h                                                                                                  | 125 ± 25.42  | <0.001 * |
|    |                                                              |      |                                                                                                       | 3.20 ± 0.84  | <0.001)  |
|    | Control (Port Site<br>Infiltration)                          | 30   |                                                                                                       |              |          |
|    |                                                              |      | 24 h                                                                                                  | 175 ± 25.42  | <0.001 * |
|    |                                                              |      |                                                                                                       | 1.70 ± 0.65  | <0.001 * |

|    |                 |      |                                           |                                  |          |                                                                                                                                                                                                                                                          |
|----|-----------------|------|-------------------------------------------|----------------------------------|----------|----------------------------------------------------------------------------------------------------------------------------------------------------------------------------------------------------------------------------------------------------------|
| 20 | Bhalekar [74]   | 2018 |                                           |                                  |          |                                                                                                                                                                                                                                                          |
|    |                 |      | US-TAP block,<br>Subcostal                |                                  |          |                                                                                                                                                                                                                                                          |
|    |                 |      | 24 h                                      | Yes = 17(68.0)<br>No = 8(32.0)   | 0.002 *  |                                                                                                                                                                                                                                                          |
|    |                 |      |                                           | Yes = 2(8.0)<br>No = 23(92.0)    | 0.001 *  |                                                                                                                                                                                                                                                          |
|    |                 |      | US-TAP block<br>(0.9% Normal sa-<br>line) |                                  |          |                                                                                                                                                                                                                                                          |
|    |                 |      | 24 h                                      | Yes = 25(100.00)<br>No = 0(0.00) | 0.002 *  |                                                                                                                                                                                                                                                          |
|    |                 |      |                                           | Yes = 24(96.0)<br>No = 1(4.0)    | 0.001 *  |                                                                                                                                                                                                                                                          |
| 21 | Sarvesh [75]    | 2018 |                                           |                                  |          |                                                                                                                                                                                                                                                          |
|    |                 |      | US-TAP Block 1                            | 30                               | 24 h     | Postoperatively, it took 485.6 min for the first analgesic to be requested in US-TAP Block 2, compared with 289.8 min in US-TAP Block 1. Patients in US-TAP block 2 consumed less cumulative morphine in the first 24 h than patients in US-TAP block 1. |
|    |                 |      |                                           |                                  |          | 0.0001 *                                                                                                                                                                                                                                                 |
|    |                 |      |                                           |                                  |          | Patients in US-TAP block 2 consumed less cumulative morphine in the first 24 h than patients in US-TAP block 1.                                                                                                                                          |
|    |                 |      |                                           |                                  |          | <0.00001 *                                                                                                                                                                                                                                               |
|    |                 |      | US-TAP Block 2                            | 30                               | 24 h     | Postoperatively, it took 485.6 min for the first analgesic to be requested in US-TAP Block 2, compared with 289.8 min in US-TAP Block 1.                                                                                                                 |
|    |                 |      |                                           |                                  |          | 0.0001 *                                                                                                                                                                                                                                                 |
|    |                 |      |                                           |                                  |          | Patients in US-TAP block 2 consumed less cumulative morphine in the first 24 h than patients in US-TAP block 1.                                                                                                                                          |
|    |                 |      |                                           |                                  |          | <0.00001 *                                                                                                                                                                                                                                               |
| 22 | Suseela [76]    | 2018 |                                           |                                  |          |                                                                                                                                                                                                                                                          |
|    |                 |      | US-TAP Block,<br>Subcostal                | 40                               | 1 h      | 0.00(0.00) 1.13                                                                                                                                                                                                                                          |
|    |                 |      |                                           |                                  | 2 h      | 0.03(0.16) 1.1 0.004 *                                                                                                                                                                                                                                   |
|    |                 |      |                                           |                                  | 3 h      | 0.43(0.55) 0.7 <0.001 *                                                                                                                                                                                                                                  |
|    |                 |      |                                           |                                  | 6 h      | 1.35(0.80) -0.22 <0.001 *                                                                                                                                                                                                                                |
|    |                 |      |                                           |                                  | 12 h     | 0.93(0.86) 0.2 <0.001 *                                                                                                                                                                                                                                  |
|    |                 |      |                                           |                                  | 24 h     | 1.13(0.52) <0.001 *                                                                                                                                                                                                                                      |
|    |                 |      |                                           |                                  |          | 510.3 ± 154.55                                                                                                                                                                                                                                           |
|    |                 |      |                                           |                                  |          | 48.69 ± 36.14 mg 0.001 *                                                                                                                                                                                                                                 |
|    |                 |      | Control (Port Site<br>Infiltration)       | 40                               | 1 h      | 0.00(0.00) 2.25                                                                                                                                                                                                                                          |
|    |                 |      |                                           |                                  | 2 h      | 0.30(0.56) 1.95 0.004 *                                                                                                                                                                                                                                  |
|    |                 |      |                                           |                                  | 3 h      | 2.05(0.96) 0.2 <0.001 *                                                                                                                                                                                                                                  |
|    |                 |      |                                           |                                  | 6 h      | 3.10(1.19) -0.85 <0.001 *                                                                                                                                                                                                                                |
|    |                 |      |                                           |                                  | 12 h     | 2.48(0.82) -0.23 <0.001 *                                                                                                                                                                                                                                |
|    |                 |      |                                           |                                  | 24 h     | 2.25(0.59) <0.001 *                                                                                                                                                                                                                                      |
|    |                 |      |                                           |                                  |          | 292.7 ± 67.03                                                                                                                                                                                                                                            |
|    |                 |      |                                           |                                  |          | 141.8 ± 60.01 mg 0.001 *                                                                                                                                                                                                                                 |
| 23 | Altıparmak [77] | 2019 |                                           |                                  |          |                                                                                                                                                                                                                                                          |
|    |                 |      | US-OSTAP<br>Block.                        |                                  |          |                                                                                                                                                                                                                                                          |
|    |                 |      |                                           | 96.3 ± 30.8<br>8<br>24<br>24     | 0.821    |                                                                                                                                                                                                                                                          |
|    |                 |      | First<br>24 h                             | 48                               |          |                                                                                                                                                                                                                                                          |
|    |                 |      | First<br>24 h                             | 199.4 ± 27.7                     | <0.001 * |                                                                                                                                                                                                                                                          |
|    |                 |      | US-ESP Block                              |                                  |          |                                                                                                                                                                                                                                                          |
|    |                 |      |                                           | 95.5 ± 23.3                      | 0.821    |                                                                                                                                                                                                                                                          |
|    |                 |      | 1 h                                       | 4                                |          |                                                                                                                                                                                                                                                          |
|    |                 |      | First<br>12 h                             | 8                                |          |                                                                                                                                                                                                                                                          |
|    |                 |      | 2 <sup>nd</sup> 12<br>h                   | 16                               |          |                                                                                                                                                                                                                                                          |
|    |                 |      | First<br>24 h                             | 24                               |          |                                                                                                                                                                                                                                                          |
|    |                 |      | First<br>24 h                             | 139.1 ± 21.9                     | <0.001 * |                                                                                                                                                                                                                                                          |
| 24 | Baytar [78]     | 2019 |                                           |                                  |          |                                                                                                                                                                                                                                                          |
|    |                 |      | US-TAP Block<br>(subcostal)               | 53                               |          |                                                                                                                                                                                                                                                          |
|    |                 |      |                                           | 1.63 ± 0.23                      | 0.056 *  |                                                                                                                                                                                                                                                          |
|    |                 |      |                                           | 63.73 (103.42)                   | 0.187    |                                                                                                                                                                                                                                                          |
|    |                 |      |                                           | 83.43(71.25)                     | 0.754    |                                                                                                                                                                                                                                                          |

| Visual Analogue Scale         |                                        |               |                                                                  |          |
|-------------------------------|----------------------------------------|---------------|------------------------------------------------------------------|----------|
|                               | 0 h                                    | 1.33(1.50)    | -1.22                                                            | 0.418    |
|                               | 1 h                                    | 0.75(1.29)    | -0.64                                                            | 0.227    |
|                               | 6 h                                    | 0.47(0.95)    | -0.36                                                            | 0.734    |
|                               | 12 h                                   | 0.20(0.53)    | -0.09                                                            | 0.554    |
|                               | 24 h                                   | 0.11(0.37)    |                                                                  | 0.951    |
| Dynamic Visual Analogue Scale |                                        |               |                                                                  |          |
|                               | 0 h                                    | 2.42(2.10)    | -2.1                                                             | 0.879    |
|                               | 1 h                                    | 1.94(1.87)    | -1.62                                                            | 0.720    |
|                               | 6 h                                    | 1.38(1.52)    | -1.06                                                            | 0.535    |
|                               | 12 h                                   | 1.00(1.28)    | -0.68                                                            | 0.815    |
|                               | 24 h                                   | 0.32(0.85)    |                                                                  | 0.402    |
| Quadratus Lum-<br>borum-Block | 54                                     |               |                                                                  |          |
|                               |                                        | 1.67 ± 0.27   |                                                                  | 0.056 *  |
|                               |                                        | 70.00 ± 92.76 |                                                                  | 0.187    |
|                               |                                        | 86.66 ± 67.82 |                                                                  | 0.754    |
| Visual Analogue Scale         |                                        |               |                                                                  |          |
|                               | 0 h                                    | 1.03(1.18)    | -0.94                                                            | 0.418    |
|                               | 1 h                                    | 0.70(0.76)    | -0.61                                                            | 0.227    |
|                               | 6 h                                    | 0.42(0.74)    | -0.33                                                            | 0.734    |
|                               | 12 h                                   | 0.22(0.46)    | -0.13                                                            | 0.554    |
|                               | 24 h                                   | 0.09(0.029)   |                                                                  | 0.951    |
| Dynamic Visual Analogue Scale |                                        |               |                                                                  |          |
|                               | 0 h                                    | 2.42(2.10)    | -1.96                                                            | 0.879    |
|                               | 1 h                                    | 1.90(1.49)    | -1.44                                                            | 0.720    |
|                               | 6 h                                    | 1.50(1.38)    | -1.04                                                            | 0.535    |
|                               | 12 h                                   | 0.92(1.24)    | -0.46                                                            | 0.815    |
|                               | 24 h                                   | 0.46(0.88)    |                                                                  | 0.402    |
| 25                            | Houben [79]                            | 2019          |                                                                  |          |
|                               | US-TAP Block<br>(Levobupiva-<br>caine) | 26            |                                                                  |          |
|                               |                                        |               | 5.6(4.9)                                                         | 0.71     |
|                               |                                        |               | 4.2(5.8)                                                         | 0.72     |
|                               |                                        |               | 21.2(14.5)                                                       | 0.48     |
|                               | US-TAP Block<br>(Saline)               | 26            |                                                                  |          |
|                               |                                        |               | 6.2(6.4)                                                         | 0.71     |
|                               |                                        |               | 6.5(10.5)                                                        | 0.72     |
|                               |                                        |               | 25.2(25.3)                                                       | 0.48     |
| 26                            | Janjua [80]                            | 2019          |                                                                  |          |
|                               | US-TAP Block,<br>Unilateral            | 50            |                                                                  |          |
|                               |                                        | 0 h           | 2.65(1.60)                                                       | 0.02     |
|                               |                                        | 1 h           | 3.20(1.26)                                                       | -0.53    |
|                               |                                        | 2 h           | 3.47(1.62)                                                       | -0.8     |
|                               |                                        | 8 h           | 1.36(0.74)                                                       | 1.31     |
|                               |                                        | 24 h          | 2.67(1.47)                                                       | <0.001 * |
|                               | Control (Port Site<br>Infiltration)    | 50            |                                                                  |          |
|                               |                                        | 0 h           | 4.42(1.11)                                                       | -0.5     |
|                               |                                        | 1 h           | 4.64(1.63)                                                       | -0.72    |
|                               |                                        | 2 h           | 5.08(1.45)                                                       | -1.16    |
|                               |                                        | 8 h           | 1.52(0.59)                                                       | 2.4      |
|                               |                                        | 24 h          | 3.92(1.88)                                                       | <0.001 * |
| 27                            | Karnik [81]                            | 2019          |                                                                  |          |
|                               | US-TAP Block                           | 40            | Pain scores were presented as Median(Interquartile range values) |          |
|                               |                                        | 10 min        | 2(0-2.5)                                                         | 0.011 *  |
|                               |                                        | 30 min        | 1.5(0-3)                                                         | <0.001 * |
|                               |                                        | 1 h           | 1.5(0-2)                                                         | <0.001 * |
|                               |                                        | 2 h           | 2(0-2)                                                           | 0.010 *  |
|                               |                                        | 3 h           | 2(0-2)                                                           | 0.352    |
|                               |                                        | 4 h           | 0(0-2)                                                           | 0.267    |
|                               |                                        | 6 h           | 0(0-2)                                                           | 0.509    |
|                               |                                        |               | 5                                                                | 0.001    |
|                               |                                        |               | 8                                                                | 0.001    |
|                               | Control (Port<br>Sites Infiltration)   | 40            | Pain scores were presented as Median(Interquartile range values) |          |
|                               |                                        | 10 min        | 2(3-4)                                                           | 0.011 *  |
|                               |                                        | 30 min        | 3(2-5)                                                           | <0.001 * |
|                               |                                        | 1 h           | 2(2-3)                                                           | <0.001 * |
|                               |                                        | 2 h           | 2(1.5-2.5)                                                       | 0.010 *  |
|                               |                                        | 3 h           | 2(0-2)                                                           | 0.352    |

|    |                                         |      |           |                                       |         |
|----|-----------------------------------------|------|-----------|---------------------------------------|---------|
|    |                                         |      | 4 h       | 2(0–2)                                | 0.267   |
|    |                                         |      | 6 h       | 0(0–2)                                | 0.509   |
|    |                                         |      |           | 38                                    | 0.001 * |
|    |                                         |      |           | 30                                    | 0.001 * |
| 28 | Khandelwal [82]                         | 2019 |           |                                       |         |
|    | US-STA Block                            |      | 40        |                                       |         |
|    |                                         |      | 0 h       | 2.32(0.82)                            | 1.05    |
|    |                                         |      | 1 h       | 3.32(1.09)                            | 0.05    |
|    |                                         |      | 2 h       | 3.37(1.29)                            | 0.0     |
|    |                                         |      | 4 h       | 3.65(1.14)                            | –0.28   |
|    |                                         |      | 6 h       | 3.2(1.09)                             | 0.17    |
|    |                                         |      | 12 h      | 2.45(1.13)                            | 0.92    |
|    |                                         |      | 24 h      | 3.37(1.29)                            | 0.76    |
|    | Control (Intra-peritoneal Infiltration) |      | 40        |                                       |         |
|    |                                         |      | 0 h       | 3.7(1.5)                              | –0.9    |
|    |                                         |      | 1 h       | 4.2(1.39)                             | –1.4    |
|    |                                         |      | 2 h       | 4.02(1.38)                            | –1.22   |
|    |                                         |      | 4 h       | 4.45(1.17)                            | –1.65   |
|    |                                         |      | 6 h       | 3.77(1.25)                            | –0.97   |
|    |                                         |      | 12 h      | 2.70(1.13)                            | 0.1     |
|    |                                         |      | 24 h      | 2.8(1.50)                             | 0.76    |
| 29 | Ribeiro [83]                            | 2019 |           |                                       |         |
|    | US-OSTAP Block (Ropivacaine)            |      | 21        |                                       |         |
|    |                                         |      | 0 h       | 0.71(1.06)                            | –0.33   |
|    |                                         |      | 30 min    | 1.3(1.62)                             | –0.92   |
|    |                                         |      | 2 h       | 1.45(1.65)                            | –1.07   |
|    |                                         |      | 4 h       | 0.90(1.44)                            | –0.52   |
|    |                                         |      | 6 h       | 0.20(0.56)                            | 0.18    |
|    |                                         |      | 24 h      | 0.38(0.60)                            | 0.035 * |
|    |                                         |      |           | 122(19.21)                            | 0.575   |
|    |                                         |      | First 8 h | 4.64(3.38)                            | 1.25    |
|    |                                         |      | 8–16 h    | 1.25(2.75)                            | 4.64    |
|    |                                         |      | 16–24 h   | NA                                    |         |
|    |                                         |      | 24 h      | 5.89(6.13)                            | 0.05 *  |
|    | US-OSTAP Block (Normal saline)          |      | 21        |                                       |         |
|    |                                         |      | 0 h       | 2.21(1.61)                            | –0.69   |
|    |                                         |      | 30 min    | 2.30(1.35)                            | –0.78   |
|    |                                         |      | 2 h       | 2.52(1.20)                            | –1.0    |
|    |                                         |      | 4 h       | 2.29(1.55)                            | –0.77   |
|    |                                         |      | 6 h       | 1.71(1.05)                            | –0.19   |
|    |                                         |      | 24 h      | 1.52(0.98)                            | 0.035 * |
|    |                                         |      |           | 126.19(21.61)                         |         |
|    |                                         |      | First 8 h | 9.52(3.76)                            | 1.78    |
|    |                                         |      | 8–16 h    | 0.83(2.14)                            | 10.47   |
|    |                                         |      | 16–24 h   | 0.95(2.11)                            | 10.35   |
|    |                                         |      | 24 h      | 11.3(8.03)                            | 0.05 *  |
| 30 | Siriwardana [84]                        | 2019 |           |                                       |         |
|    | LAP-TAP Block + port Site infiltration  |      | 45        |                                       |         |
|    |                                         |      | 6 h       | 6(2–10)                               | 0.043 * |
|    |                                         |      | 12 h      | 4(2–9)                                | 0.587   |
|    |                                         |      | 18 h      | 3(0–7)                                | 0.135   |
|    |                                         |      | 24 h      | 2(0–8)                                | 0.188   |
|    |                                         |      | 36 h      | 1(0–6)                                | 0.093   |
|    |                                         |      |           | Opioids requirement (Number of doses) |         |
|    |                                         |      | 6 h       | 1(0–1)                                | 0.021 * |
|    |                                         |      | 12 h      | 0(0–6)                                | 0.414   |
|    |                                         |      | 18 h      | 0(0–3)                                | 0.715   |
|    |                                         |      | 24 h      | 0(0–4)                                | 0.267   |
|    |                                         |      | 36 h      | 0(0–4)                                | 0.671   |
|    | Control (Port Site Infiltration)        |      | 45        |                                       |         |
|    |                                         |      | 6 h       | 5(0–9)                                | 0.043 * |
|    |                                         |      | 12 h      | 4(1–7)                                | 0.587   |
|    |                                         |      | 18 h      | 2(0–6)                                | 0.135   |
|    |                                         |      | 24 h      | 2(0–6)                                | 0.188   |



|    |                                             |      |                                                                                           |                                        |       |         |
|----|---------------------------------------------|------|-------------------------------------------------------------------------------------------|----------------------------------------|-------|---------|
|    |                                             | 36 h |                                                                                           | 0(0–5)                                 |       | 0.093   |
|    |                                             |      |                                                                                           | Opioids requirement (Number of doses)  |       |         |
|    |                                             | 6 h  |                                                                                           | 1(0–1)                                 |       | 0.021 * |
|    |                                             | 12 h |                                                                                           | 0(0–6)                                 |       | 0.414   |
|    |                                             | 18 h |                                                                                           | 0(0–2)                                 |       | 0.715   |
|    |                                             | 24 h |                                                                                           | 0(0–2)                                 |       | 0.267   |
|    |                                             | 36 h |                                                                                           | 0(0–2)                                 |       | 0.671   |
| 31 | Wu [85]                                     | 2019 |                                                                                           |                                        |       |         |
|    | LAI Group                                   | 60   | The three groups did not differ in pain scores at each time point within the 48 h period. |                                        |       |         |
|    | TL-Group                                    | 60   | The three groups did not differ in pain scores at each time point within the 48 h period. |                                        |       |         |
|    | TR-Group                                    | 60   | The three groups did not differ in pain scores at each time point within the 48 h period. |                                        |       |         |
| 32 | Arik [86]                                   | 2020 |                                                                                           |                                        |       |         |
|    | TAP Block, sub-costal                       | 24   |                                                                                           | Post-operative Pain scores at Rest     |       |         |
|    |                                             | 1 h  |                                                                                           | 3.29(2.1)                              | –2.46 | 0.001 * |
|    |                                             | 3 h  |                                                                                           | 1.87(1.5)                              | –1.04 | 0.001 * |
|    |                                             | 6 h  |                                                                                           | 1.70(1.8)                              | –0.87 | 0.001 * |
|    |                                             | 12 h |                                                                                           | 1.20(1.2)                              | –0.37 | 0.001 * |
|    |                                             | 24 h |                                                                                           | 0.83(1.0)                              |       | 0.001 * |
|    |                                             |      |                                                                                           | Post-operative Pain score during Cough |       |         |
|    |                                             | 1 h  |                                                                                           | 3.83(2.2)                              | –2.42 | 0.001 * |
|    |                                             | 3 h  |                                                                                           | 2.45(1.7)                              | –1.04 | 0.001 * |
|    |                                             | 6 h  |                                                                                           | 2.38(1.9)                              | –0.97 | 0.001 * |
|    |                                             | 12 h |                                                                                           | 2.04(1.5)                              | –0.63 | 0.001 * |
|    |                                             | 24 h |                                                                                           | 1.41(1.3)                              |       | 0.001 * |
|    | Local Anaesthetic Infiltration (Port Sites) | 24   |                                                                                           | Post-operative Pain scores at rest     |       |         |
|    |                                             | 1 h  |                                                                                           | 4.95(2.1)                              | –3.66 | 0.001 * |
|    |                                             | 3 h  |                                                                                           | 2.54(1.7)                              | –1.25 | 0.001 * |
|    |                                             | 6 h  |                                                                                           | 2.29(1.9)                              | –1.0  | 0.001 * |
|    |                                             | 12 h |                                                                                           | 2.20(1.7)                              | –0.91 | 0.001 * |
|    |                                             | 24 h |                                                                                           | 1.29(1.2)                              |       | 0.001 * |
|    |                                             |      |                                                                                           | 1(4.2)                                 |       |         |
|    |                                             |      |                                                                                           | Post-operative Pain score during Cough |       |         |
|    |                                             | 1 h  |                                                                                           | 5.87(2.2)                              | –4.0  | 0.001 * |
|    |                                             | 3 h  |                                                                                           | 3.50(2.0)                              | –1.63 | 0.001 * |
|    |                                             | 6 h  |                                                                                           | 3.16(2.2)                              | –1.29 | 0.001 * |
|    |                                             | 12 h |                                                                                           | 2.95(1.8)                              | –1.08 | 0.001 * |
|    |                                             | 24 h |                                                                                           | 1.87(1.0)                              |       | 0.001 * |
|    | Control (IV-PCA + GA)                       | 24   |                                                                                           | Post-operative Pain scores at rest     |       |         |
|    |                                             | 1 h  |                                                                                           | 5.7(2.4)                               | –4.2  | 0.001 * |
|    |                                             | 3 h  |                                                                                           | 2.87(2.2)                              | –1.37 | 0.001 * |
|    |                                             | 6 h  |                                                                                           | 2.62(1.6)                              | –1.12 | 0.001 * |
|    |                                             | 12 h |                                                                                           | 2.70(2.0)                              | –1.2  | 0.001 * |
|    |                                             | 24 h |                                                                                           | 1.50(1.50)                             |       | 0.001 * |
|    |                                             |      |                                                                                           | 2(8.3)                                 |       |         |
|    |                                             |      |                                                                                           | Post-operative Pain score during Cough |       |         |
|    |                                             | 1 h  |                                                                                           | 6.33(2.3)                              | –4.46 | 0.001 * |
|    |                                             | 3 h  |                                                                                           | 3.20(2.0)                              | –1.33 | 0.001 * |
|    |                                             | 6 h  |                                                                                           | 3.33(1.6)                              | –1.46 | 0.001 * |
|    |                                             | 12 h |                                                                                           | 3.45(2.4)                              | –1.58 | 0.001 * |
|    |                                             | 24 h |                                                                                           | 1.87(1.5)                              |       | 0.001 * |
|    |                                             |      |                                                                                           | 3(2.5)                                 |       |         |
| 33 | Kharbuja [87]                               | 2020 |                                                                                           |                                        |       |         |
|    | US-TAP Block                                |      |                                                                                           |                                        |       |         |
|    |                                             | 0 h  |                                                                                           | 3.10(0.48)                             | –0.43 | 0.044 * |
|    |                                             | 1 h  |                                                                                           | 2.87(0.81)                             | –0.2  | 0.001 * |
|    |                                             | 2 h  |                                                                                           | 3.23(1.06)                             | –0.56 | 0.001 * |
|    |                                             | 4 h  |                                                                                           | 3.33(1.18)                             | –0.66 | 0.001 * |
|    |                                             | 8 h  |                                                                                           | 3.37(0.90)                             | –0.7  | 0.001 * |
|    |                                             | 16 h |                                                                                           | 3.10(0.75)                             | –0.43 | 0.001 * |
|    |                                             | 24 h |                                                                                           | 2.67(0.95)                             |       | 0.001 * |
|    |                                             |      |                                                                                           | 3.36(2.09)                             |       | 0.001 * |
|    |                                             |      |                                                                                           | 136(66.31)                             |       | 0.001 * |
|    | Control (Port Site Infiltration)            |      |                                                                                           |                                        |       |         |
|    |                                             | 0 h  |                                                                                           | 3.37(0.49)                             | 0.46  | 0.044 * |
|    |                                             | 1 h  |                                                                                           | 3.87(1.07)                             | –0.04 | 0.001 * |
|    |                                             | 2 h  |                                                                                           | 4.30(0.988)                            | –0.47 | 0.001 * |
|    |                                             | 4 h  |                                                                                           | 4.37(1.12)                             | –0.54 | 0.001 * |
|    |                                             | 8 h  |                                                                                           | 4.87(1.00)                             | –1.04 | 0.001 * |
|    |                                             | 16 h |                                                                                           | 4.27(0.94)                             | –0.44 | 0.001 * |

|    |                                                      |      |                         |             |                                                             |         |
|----|------------------------------------------------------|------|-------------------------|-------------|-------------------------------------------------------------|---------|
|    |                                                      | 24 h |                         | 3.83(0.83)  |                                                             | 0.001 * |
|    |                                                      |      |                         | 1.73(1.60)  |                                                             | 0.001 * |
|    |                                                      |      |                         | 202(80.58)  |                                                             | 0.001 * |
| 34 | Liang [88]                                           | 2020 |                         |             |                                                             |         |
|    | Group H (0.75% Ropivacaine)                          | 30   |                         |             | PACU <i>n</i> (%): 11(36.7%)<br>Ward <i>n</i> (%): 4(13.3%) |         |
|    | Group M (0.5% Ropivacaine)                           | 30   |                         |             | PACU <i>n</i> (%): 12(40%)<br>Ward <i>n</i> (%): 3(10%)     |         |
|    | Group L (0.25% Ropivacaine)                          | 30   |                         |             | PACU <i>n</i> (%): 10(33.3%)<br>Ward <i>n</i> (%): 5(16.7%) |         |
|    | Group Control (0.9% normal saline)                   | 30   |                         |             | PACU <i>n</i> (%): 21(70%)<br>Ward <i>n</i> (%): 13(43.3%)  |         |
| 35 | Abdelfatah [89]                                      | 2021 |                         |             |                                                             |         |
|    | US-TAP-Block group 1 (Bupivacaine + Esmolol)         |      | Arri-<br>val to<br>PACU | 0.87(1.01)  | 2.16                                                        | 0.010 * |
|    |                                                      |      | 1 h                     | 0.97(0.85)  | 2.06                                                        | 0.034 * |
|    |                                                      |      | 2 h                     | 1.67(0.92)  | 1.36                                                        | 0.083   |
|    |                                                      |      | 6 h                     | 2.63(1.38)  | 0.4                                                         | 0.286   |
|    |                                                      |      | 12 h                    | 3.07(1.53)  | -0.04                                                       | 0.662   |
|    |                                                      |      | 24 h                    | 3.03(1.47)  |                                                             | 0.437   |
|    |                                                      |      |                         | 12.91(6.16) |                                                             | 0.148   |
|    |                                                      |      |                         | 5.83(2.87)  |                                                             | 0.204   |
|    | US-TAP-Block group 2 (Bupivacaine + Isotonic saline) |      | Arri-<br>val to<br>PACU | 0.83(1.26)  | 2.5                                                         | 0.010 * |
|    |                                                      |      | 1 h                     | 1.7(1.64)   | 1.63                                                        | 0.034 * |
|    |                                                      |      | 2 h                     | 2.03(0.67)  | 1.3                                                         | 0.083   |
|    |                                                      |      | 6 h                     | 3.0(1.26)   | 0.33                                                        | 0.286   |
|    |                                                      |      | 12 h                    | 3.23(1.41)  | 0.1                                                         | 0.662   |
|    |                                                      |      | 24 h                    | 3.33(1.49)  |                                                             | 0.437   |
|    |                                                      |      |                         | 9.13(6.69)  |                                                             | 0.148   |
|    |                                                      |      |                         | 7.5(3.65)   |                                                             | 0.204   |
| 36 | Ergin [90]                                           | 2021 |                         |             |                                                             |         |
|    | TAI-Group                                            | 40   |                         |             |                                                             |         |
|    |                                                      |      | 1 h                     | 3.08(2.75)  | -1.33                                                       | 0.001 * |
|    |                                                      |      | 2 h                     | 2.6 (2.05)  | -0.85                                                       | 0.001 * |
|    |                                                      |      | 4 h                     | 2.43(2.16)  | -0.68                                                       | 0.001 * |
|    |                                                      |      | 6 h                     | 2.2 (2.17)  | -0.45                                                       | 0.001 * |
|    |                                                      |      | 12 h                    | 2.25(2.25)  | -0.5                                                        | 0.001 * |
|    |                                                      |      | 24 h                    | 1.75(1.9)   |                                                             | 0.001 * |
|    | TAPB-Group                                           | 40   |                         |             |                                                             |         |
|    |                                                      |      | 1 h                     | 3.3(2.44)   | -2.17                                                       | 0.001 * |
|    |                                                      |      | 2 h                     | 2.43(1.62)  | -1.3                                                        | 0.001 * |
|    |                                                      |      | 4 h                     | 2.3(1.9)    | -1.17                                                       | 0.001 * |
|    |                                                      |      | 6 h                     | 2.2(2.19)   | -1.07                                                       | 0.001 * |
|    |                                                      |      | 12 h                    | 1.23(1.27)  | -0.1                                                        | 0.001 * |
|    |                                                      |      | 24 h                    | 1.13(1.07)  |                                                             | 0.001 * |
|    | IPLA-Group                                           | 40   |                         |             |                                                             |         |
|    |                                                      |      | 1 h                     | 4.7(2.5)    | -1.77                                                       | 0.001 * |
|    |                                                      |      | 2 h                     | 4.15(1.83)  | -1.22                                                       | 0.001 * |
|    |                                                      |      | 4 h                     | 4.0(2.18)   | -1.07                                                       | 0.001 * |
|    |                                                      |      | 6 h                     | 3.53(2.14)  | -0.6                                                        | 0.001 * |
|    |                                                      |      | 12 h                    | 3.23(1.95)  | -0.3                                                        | 0.001 * |
|    |                                                      |      | 24 h                    | 2.93(1.86)  |                                                             | 0.001 * |
|    | Control (Sham)                                       | 40   |                         |             |                                                             |         |
|    |                                                      |      | 1 h                     | 7.03(2.18)  | -2.88                                                       | 0.001 * |
|    |                                                      |      | 2 h                     | 6.45(1.71)  | -1.3                                                        | 0.001 * |

|    |                         |      |                |            |        |         |
|----|-------------------------|------|----------------|------------|--------|---------|
|    |                         |      | 4 h            | 5.35(1.66) | -1.2   | 0.001 * |
|    |                         |      | 6 h            | 5.0(1.68)  | -0.85  | 0.001 * |
|    |                         |      | 12 h           | 4.73(2.1)  | -0.58  | 0.001 * |
|    |                         |      | 24 h           | 4.15(2.12) |        | 0.001 * |
| 37 | Jung [91]               | 2021 |                |            |        |         |
|    | BD-TAP Block            |      |                |            |        |         |
|    |                         |      | 2 h            | 3(2-4.75)  |        | 0.024 * |
|    |                         |      |                | 4(3-6)     |        | 0.047 * |
|    |                         |      |                | 4.2(2.1)   |        | 0.013 * |
|    |                         |      | 6 h            | 3(2-4)     |        | 0.442   |
|    |                         |      |                | 3.9(1.9)   | -1.0   | 0.281   |
|    |                         |      |                | 3(3-4)     |        | 0.218   |
|    |                         |      | 12 h           | 3(2-4)     |        | 0.721   |
|    |                         |      |                | 3(3-4)     |        | 0.753   |
|    |                         |      |                | 3(2-4.75)  |        | 0.771   |
|    |                         |      | 24 h           | 2(2-3)     |        | 0.981   |
|    |                         |      |                | 3(2-4)     |        | 0.719   |
|    |                         |      |                | 3(2-3)     |        | 0.531   |
|    |                         |      | 48 h           | 2(1-3)     |        | 0.863   |
|    |                         |      |                | 2.9(1.5)   |        | 646     |
|    |                         |      |                | 2(2-3)     |        | 0.653   |
|    |                         |      | 593.5(507-700) |            |        | 0.921   |
|    |                         |      | 181.5(105-286) |            |        | 0.771   |
|    |                         |      | 2.5(2-3)       |            |        | 0.184   |
|    |                         |      |                |            |        |         |
|    | Control (Sham)          |      |                |            |        |         |
|    |                         |      | 2 h            | 4.5(3-6)   |        | 0.024 * |
|    |                         |      |                | 6(4-8)     |        | 0.047   |
|    |                         |      |                | 5.7(2.5)   |        | 0.013 * |
|    |                         |      | 6 h            | 3.0(2-4.8) |        | 0.442   |
|    |                         |      |                | 4.4(2.2)   | -1.3   | 0.281   |
|    |                         |      |                | 4(2-6)     |        | 0.218   |
|    |                         |      | 12 h           | 3(2-4)     |        | 0.721   |
|    |                         |      |                | 4(2-5)     |        | 0.753   |
|    |                         |      |                | 3(2-5)     |        | 0.771   |
|    |                         |      | 24 h           | 2(1.3-3.8) |        | 0.981   |
|    |                         |      |                | 3(2-5)     |        | 0.719   |
|    |                         |      |                | 3(2-4)     |        | 0.531   |
|    |                         |      | 48 h           | 2(1-3)     |        | 0.863   |
|    |                         |      |                | 3.1(1.7)   |        | 646     |
|    |                         |      |                | 3(1-3)     |        | 0.653   |
|    |                         |      | 605.5(500-746) |            |        | 0.921   |
|    |                         |      | 189(130-283)   |            |        | 0.771   |
|    |                         |      | 3.0(2-4)       |            |        | 0.184   |
| 38 | Sahu [92]               | 2021 |                |            |        |         |
|    | US-ESP-Block (at T7)    | 30   | Mean values    |            |        |         |
|    |                         |      | 2 h            | 1.60       | -1.5   | 0.029 * |
|    |                         |      | 4 h            | 1.17       | -1.07  | 0.001 * |
|    |                         |      | 6 h            | 0.90       | -0.8   | 0.001 * |
|    |                         |      | 8 h            | 0.33       | -0.23  | 0.001 * |
|    |                         |      | 10 h           | 0.60       | -0.5   | 0.001 * |
|    |                         |      | 12 h           | 0.83       | -0.73  | 0.001 * |
|    |                         |      | 14 h           | 0.83       | -0.73  | 0.001 * |
|    |                         |      | 16 h           | 0.20       | -0.1   | 0.001 * |
|    |                         |      | 18 h           | 0.13       | -0.03  | 0.001 * |
|    |                         |      | 20 h           | 0.17       | -0.07  | 0.001 * |
|    |                         |      | 22 h           | 0.10       | 0      | 0.001 * |
|    |                         |      | 24 h           | 0.10       |        | 0.001 * |
|    |                         |      | 6.9(1.8)       |            |        | 0.174   |
|    | OSTAP-Block (Bilateral) | 30   |                |            |        |         |
|    |                         |      | 2 h            | 2.27       | -01.57 | 0.029 * |
|    |                         |      | 4 h            | 2.73       | -2.03  | 0.001 * |
|    |                         |      | 6 h            | 2.33       | -1.63  | 0.001 * |
|    |                         |      | 8 h            | 1.80       | -1.1   | 0.001 * |
|    |                         |      | 10 h           | 1.87       | -1.17  | 0.001 * |
|    |                         |      | 12 h           | 2.23       | -1.53  | 0.001 * |
|    |                         |      | 14 h           | 1.70       | -1.0   | 0.001 * |
|    |                         |      | 16 h           | 1.67       | -0.97  | 0.001 * |

|    |                                  |      |                |                           |       |                       |
|----|----------------------------------|------|----------------|---------------------------|-------|-----------------------|
|    |                                  |      | 18 h           | 1.23                      | -0.53 | 0.001 *               |
|    |                                  |      | 20 h           | 1.07                      | -0.37 | 0.001 *               |
|    |                                  |      | 22 h           | 1.10                      | -0.4  | 0.001 *               |
|    |                                  |      | 24 h           | 0.70                      |       | 0.001 *               |
|    |                                  |      |                | 7.6(2.3)                  |       | 0.174                 |
| 39 | Saravanan [93]                   | 2021 |                |                           |       |                       |
|    | US-Modified<br>BRILMA-Block      | 30   |                |                           |       |                       |
|    |                                  |      |                | 5.67(1.98)                |       | 0.317                 |
|    |                                  |      |                | 759.33(80.29)             |       | 0.295                 |
|    | US-TAP-Block                     | 30   |                |                           |       |                       |
|    |                                  |      |                | 5.17(1.85)                |       | 0.317                 |
|    |                                  |      |                | 854(93.01)                |       | 0.295                 |
| 40 | Vindal [94]                      | 2021 |                | VAS (REST) Median IQR     |       |                       |
|    | LAP-TAP-Block                    | 50   |                |                           |       |                       |
|    |                                  |      | 3 h            | 4(2)                      |       | 0.577                 |
|    |                                  |      | 6 h            | 3(1)                      |       | 0.187                 |
|    |                                  |      | 24 h           | 2.5(1)                    |       | 0.146                 |
|    |                                  |      | Dis-charge     | 1(1)                      |       | 0.05 *                |
|    |                                  |      | 1-week post-op | 1(1)                      |       | 0.001 *               |
|    |                                  |      |                | VAS (Coughing) Median IQR |       |                       |
|    |                                  |      | 3 h            | 5(1)                      |       | 0.001 *               |
|    |                                  |      | 6 h            | 4(1)                      |       | 0.001 *               |
|    |                                  |      | 24 h           | 3(1)                      |       | 0.001 *               |
|    |                                  |      | Dis-charge     | 1.5(1)                    |       | 0.001 *               |
|    |                                  |      | 1-week post-op | 1(1)                      |       | 0.001 *               |
|    |                                  |      |                | 14(28%)                   |       | 0.05 *                |
|    | Control (Port Site Infiltration) | 50   |                | VAS (REST) Median IQR     |       |                       |
|    |                                  |      | 3 h            | 4(2)                      |       | 0.577                 |
|    |                                  |      | 6 h            | 3(1)                      |       | 0.187                 |
|    |                                  |      | 24 h           | 3(1)                      |       | 0.146                 |
|    |                                  |      | Dis-charge     | 2(1)                      |       | 0.05                  |
|    |                                  |      | 1-week post-op | 1(1)                      |       | 0.001 *               |
|    |                                  |      |                | VAS (Coughing) Median IQR |       |                       |
|    |                                  |      | 3 h            | 5(1)                      |       | 0.001 *               |
|    |                                  |      | 6 h            | 5(1)                      |       | 0.001 *               |
|    |                                  |      | 24 h           | 3(1)                      |       | 0.001 *               |
|    |                                  |      | Dis-charge     | 3(1)                      |       | 0.001 *               |
|    |                                  |      | 1-week post-op | 1(0)                      |       | 0.001 *               |
|    |                                  |      |                | 26(52%)                   |       | 0.05 *                |
| 41 | Priyanka [95]                    | 2022 |                |                           |       |                       |
|    | US-TAP Block (Pre-induction)     |      |                |                           |       |                       |
|    |                                  |      | 30 min         | 3.18(1.04)                | 0.29  | $7.36 \times 10^{-7}$ |
|    |                                  |      | 1 h            | 0.03(0.84)                | 4.44  | $1.73 \times 10^{-6}$ |
|    |                                  |      | 2 h            | 3.13(1.00)                | 0.34  | $2.82 \times 10^{-5}$ |
|    |                                  |      | 4 h            | 3.38(1.00)                | 0.09  | $3.69 \times 10^{-6}$ |
|    |                                  |      | 8 h            | 3.42(1.00)                | 0.05  | $4.93 \times 10^{-6}$ |
|    |                                  |      | 12 h           | 3.53(1.01)                | -0.06 | $2.83 \times 10^{-4}$ |
|    |                                  |      | 24 h           | 3.47(0.81)                |       | $5.92 \times 10^{-5}$ |
|    | US-TAP Block (Post-surgery)      |      |                |                           |       |                       |
|    |                                  |      | 30 min         | 4.96(1.08)                | -0.33 | $7.36 \times 10^{-7}$ |
|    |                                  |      | 1 h            | 4.30(1.19)                | 0.33  | $1.73 \times 10^{-6}$ |
|    |                                  |      | 2 h            | 4.54(1.30)                | 0.09  | $2.82 \times 10^{-5}$ |
|    |                                  |      | 4 h            | 4.69(1.28)                | -0.06 | $3.69 \times 10^{-6}$ |
|    |                                  |      | 8 h            | 4.39(1.16)                | 0.24  | $4.93 \times 10^{-6}$ |

|    |                                                           |      |                                                                                                                                                                                                                                                                                 |                 |               |       |                       |
|----|-----------------------------------------------------------|------|---------------------------------------------------------------------------------------------------------------------------------------------------------------------------------------------------------------------------------------------------------------------------------|-----------------|---------------|-------|-----------------------|
|    |                                                           |      | 12 h                                                                                                                                                                                                                                                                            |                 | 4.71(1.29)    | -0.08 | $2.83 \times 10^{-4}$ |
|    |                                                           |      | 24 h                                                                                                                                                                                                                                                                            |                 | 4.63(1.18)    |       | $5.92 \times 10^{-5}$ |
| 42 | Emile [96]                                                | 2022 |                                                                                                                                                                                                                                                                                 |                 |               |       |                       |
|    | US-TAP Block                                              |      |                                                                                                                                                                                                                                                                                 |                 |               |       |                       |
|    |                                                           |      | 2 h                                                                                                                                                                                                                                                                             |                 | 4.4(1.3)      | -3.0  | 0.0001 *              |
|    |                                                           |      | 6 h                                                                                                                                                                                                                                                                             |                 | 2.9(0.8)      | -1.5  | 0.0001 *              |
|    |                                                           |      | 12 h                                                                                                                                                                                                                                                                            |                 | 1.9(0.7)      | -0.5  | 0.0001 *              |
|    |                                                           |      | 24 h                                                                                                                                                                                                                                                                            |                 | 1.4(0.7)      |       | 0.0001 *              |
|    |                                                           |      | 24 h                                                                                                                                                                                                                                                                            |                 | 1027.8(166.7) |       | 0.0001 *              |
|    |                                                           |      |                                                                                                                                                                                                                                                                                 |                 | 5.1(1.2)      |       | 0.0001 *              |
|    |                                                           |      |                                                                                                                                                                                                                                                                                 |                 | 1(1-2)        |       | 0.0001 *              |
|    | LSTAP Block                                               |      |                                                                                                                                                                                                                                                                                 |                 |               |       |                       |
|    |                                                           |      | 2 h                                                                                                                                                                                                                                                                             |                 | 4.8(1.2)      | -3.5  | 0.0001 *              |
|    |                                                           |      | 6 h                                                                                                                                                                                                                                                                             |                 | 3.3(1.1)      | -2.0  | 0.0001 *              |
|    |                                                           |      | 12 h                                                                                                                                                                                                                                                                            |                 | 2.1(0.7)      | -0.8  | 0.0001 *              |
|    |                                                           |      | 24 h                                                                                                                                                                                                                                                                            |                 | 1.3(0.5)      |       | 0.0001 *              |
|    |                                                           |      |                                                                                                                                                                                                                                                                                 |                 | 1055.5(232.3) |       | 0.0001 *              |
|    |                                                           |      |                                                                                                                                                                                                                                                                                 |                 | 5.4(1.0)      |       | 0.0001 *              |
|    |                                                           |      |                                                                                                                                                                                                                                                                                 |                 | 1(1-2)        |       | 0.0001 *              |
|    | Control (GA only)                                         |      |                                                                                                                                                                                                                                                                                 |                 |               |       |                       |
|    |                                                           |      | 2 h                                                                                                                                                                                                                                                                             |                 | 6.4(1.7)      | -4.2  | 0.0001 *              |
|    |                                                           |      | 6 h                                                                                                                                                                                                                                                                             |                 | 6.7(1.5)      | -4.5  | 0.0001 *              |
|    |                                                           |      | 12 h                                                                                                                                                                                                                                                                            |                 | 3.2(1.1)      | -1.0  | 0.0001 *              |
|    |                                                           |      | 24 h                                                                                                                                                                                                                                                                            |                 | 2.2(0.9)      |       | 0.0001 *              |
|    |                                                           |      |                                                                                                                                                                                                                                                                                 | 1657.9(668.8)   |               |       | .0001 *               |
|    |                                                           |      |                                                                                                                                                                                                                                                                                 | 4.1(1.2)        |               |       | .0001 *               |
|    |                                                           |      |                                                                                                                                                                                                                                                                                 | 2(1-2)          |               |       | .0001 *               |
| 43 | Fargaly [97]                                              | 2022 |                                                                                                                                                                                                                                                                                 |                 |               |       |                       |
|    | US-TAP Block Group                                        | 25   | Median (IQR)                                                                                                                                                                                                                                                                    |                 |               |       |                       |
|    |                                                           |      | 30 min                                                                                                                                                                                                                                                                          |                 | 2(2-3)        |       | 0.084                 |
|    |                                                           |      | 2 h                                                                                                                                                                                                                                                                             |                 | 3(3-3)        |       | 0.004 *               |
|    |                                                           |      | 4 h                                                                                                                                                                                                                                                                             |                 | 33-4)         |       | 0.008 *               |
|    |                                                           |      | 6 h                                                                                                                                                                                                                                                                             |                 | 4(4-5)        |       | 0.0001 *              |
|    |                                                           |      | 12 h                                                                                                                                                                                                                                                                            |                 | 5(4-6)        |       | 0.0001 *              |
|    |                                                           |      | 24 h                                                                                                                                                                                                                                                                            |                 | 4(4-5)        |       | 0.026 *               |
|    |                                                           |      |                                                                                                                                                                                                                                                                                 |                 | Yes = 18, 72% |       |                       |
|    |                                                           |      |                                                                                                                                                                                                                                                                                 |                 | No = 7, 28%   |       | 0.239                 |
|    |                                                           |      |                                                                                                                                                                                                                                                                                 | Median (IQR) => | 8(6-24)       |       | 0.001 *               |
|    |                                                           |      |                                                                                                                                                                                                                                                                                 |                 | 6(6-9)        |       | 0.0001 *              |
|    | Quadratus Lumborum (QLB-Group)                            | 25   | Median (IQR)                                                                                                                                                                                                                                                                    |                 |               |       |                       |
|    |                                                           |      | 30 min                                                                                                                                                                                                                                                                          |                 | 2(2-2)        |       | 0.084                 |
|    |                                                           |      | 2 h                                                                                                                                                                                                                                                                             |                 | 2(2-3)        |       | 0.004 *               |
|    |                                                           |      | 4 h                                                                                                                                                                                                                                                                             |                 | 3(3-3)        |       | 0.008 *               |
|    |                                                           |      | 6 h                                                                                                                                                                                                                                                                             |                 | 33-4)         |       | 0.0001 *              |
|    |                                                           |      | 12 h                                                                                                                                                                                                                                                                            |                 | 43-4)         |       | 0.0001 *              |
|    |                                                           |      | 24 h                                                                                                                                                                                                                                                                            |                 | 4(3-4)        |       | 0.026 *               |
|    |                                                           |      |                                                                                                                                                                                                                                                                                 |                 | Yes = 14, 56% |       |                       |
|    |                                                           |      |                                                                                                                                                                                                                                                                                 |                 | No = 11, 44%  |       | 0.239                 |
|    |                                                           |      |                                                                                                                                                                                                                                                                                 | Median (IQR) => | 17(12-24)     |       | 0.001 *               |
|    |                                                           |      |                                                                                                                                                                                                                                                                                 |                 | 3(3-6)        |       | 0.0001 *              |
| 44 | Han [98]                                                  | 2022 |                                                                                                                                                                                                                                                                                 |                 |               |       |                       |
|    | US-TAPB Block (Ropivacaine + Tropisetron + Normal saline) | 60   | The US-TAPB block group had significantly lower resting VAS values than the S and N groups at 2, 6, 12, 24, and 48 h postoperatively ( $p < 0.05$ ). Postoperatively, dynamic VAS was significantly lower in the US-TAPB block group ( $p < 0.05$ ) than in the S and N groups. |                 |               |       |                       |
|    | Group S (Sufentanil + Tropisetron + Normal saline)        | 60   | The US-TAPB block group had significantly lower resting VAS values than the S and N groups at 2, 6, 12, 24, and 48 h postoperatively ( $p < 0.05$ ). Postoperatively, dynamic VAS was significantly lower in the US-TAPB block group ( $p < 0.05$ ) than in the S and N groups. |                 |               |       |                       |
|    | Group N (Nalbuphine + Tropisetron + Normal saline)        | 60   | The US-TAPB block group had significantly lower resting VAS values than the S and N groups at 2, 6, 12, 24, and 48 h postoperatively ( $p < 0.05$ ). Postoperatively, dynamic VAS was significantly lower in the US-TAPB block group ( $p < 0.05$ ) than in the S and N groups. |                 |               |       |                       |
| 45 | Lee [99]                                                  | 2022 |                                                                                                                                                                                                                                                                                 |                 |               |       |                       |
|    | US-TAP Block (0.375% Ropivacaine)                         | 27   | Number (%)                                                                                                                                                                                                                                                                      |                 |               |       |                       |
|    |                                                           |      | 1 h                                                                                                                                                                                                                                                                             |                 | 15(55.6%)     |       | 0.652                 |
|    |                                                           |      | 8 h                                                                                                                                                                                                                                                                             |                 | 0(0.0%)       |       | 0.002 *               |
|    |                                                           |      | 24 h                                                                                                                                                                                                                                                                            |                 | 4(14.8%)      |       | 0.728                 |

|    |                                             |              |                                                                                                                                                                                                                                                 |       |         |
|----|---------------------------------------------|--------------|-------------------------------------------------------------------------------------------------------------------------------------------------------------------------------------------------------------------------------------------------|-------|---------|
|    | US-TAP Block<br>(normal saline)             | 26           | Number (%)                                                                                                                                                                                                                                      |       |         |
|    |                                             | 1 h          | 17(65.4%)                                                                                                                                                                                                                                       |       | 0.652   |
|    |                                             | 8 h          | 8(30.8%)                                                                                                                                                                                                                                        |       | 0.002 * |
|    |                                             | 24 h         | 5(19.2%)                                                                                                                                                                                                                                        |       | 0.728   |
| 46 | Ozciftci [100]                              | 2022         |                                                                                                                                                                                                                                                 |       |         |
|    | US-TAP Block,<br>unilateral (right<br>side) | 30           | VNRS at Rest                                                                                                                                                                                                                                    |       |         |
|    |                                             | 1 h          | 3.10(1.61)                                                                                                                                                                                                                                      | -1.87 | 0.001 * |
|    |                                             | 2 h          | 2.70(1.21)                                                                                                                                                                                                                                      | -1.47 | 0.001 * |
|    |                                             | 4 h          | 1.83(0.83)                                                                                                                                                                                                                                      | -0.6  | 0.001 * |
|    |                                             | 8 h          | 1.83(0.83)                                                                                                                                                                                                                                      | -0.6  | 0.002 * |
|    |                                             | 12 h         | 1.40(0.77)                                                                                                                                                                                                                                      | -0.17 | 0.009 * |
|    |                                             | 24 h         | 1.23(0.68)                                                                                                                                                                                                                                      |       | 0.001 * |
|    |                                             | VNRS (Cough) |                                                                                                                                                                                                                                                 |       |         |
|    |                                             | 1 h          | 3.37(1.77)                                                                                                                                                                                                                                      | -1.57 | 0.001 * |
|    |                                             | 2 h          | 5.23(2.06)                                                                                                                                                                                                                                      | -3.43 | 0.001 * |
|    |                                             | 4 h          | 2.73(1.34)                                                                                                                                                                                                                                      | -0.93 | 0.014 * |
|    |                                             | 8 h          | 2.57(1.28)                                                                                                                                                                                                                                      | -0.77 | 0.001 * |
|    |                                             | 12 h         | 2.0(1.20)                                                                                                                                                                                                                                       | -0.2  | 0.001 * |
|    |                                             | 24 h         | 1.8(1.01)                                                                                                                                                                                                                                       |       | 0.001 * |
|    | US-TAP Block,<br>bilateral                  | 30           | VNRS at Rest                                                                                                                                                                                                                                    |       |         |
|    |                                             | 1 h          | 3.33(1.06)                                                                                                                                                                                                                                      | -2.1  | 0.001 * |
|    |                                             | 2 h          | 2.87(1.22)                                                                                                                                                                                                                                      | -1.64 | 0.001 * |
|    |                                             | 4 h          | 2.17(0.79)                                                                                                                                                                                                                                      | -0.94 | 0.001 * |
|    |                                             | 8 h          | 1.73(0.74)                                                                                                                                                                                                                                      | -0.5  | 0.002 * |
|    |                                             | 12 h         | 1.63(0.89)                                                                                                                                                                                                                                      | -0.4  | 0.009 * |
|    |                                             | 24 h         | 1.23(0.90)                                                                                                                                                                                                                                      |       | 0.001 * |
|    |                                             | VNRS (Cough) |                                                                                                                                                                                                                                                 |       |         |
|    |                                             | 1 h          | 3.47(1.48)                                                                                                                                                                                                                                      | -1.9  | 0.001 * |
|    |                                             | 2 h          | 3.20(1.35)                                                                                                                                                                                                                                      | -1.63 | 0.001 * |
|    |                                             | 4 h          | 2.53(1.01)                                                                                                                                                                                                                                      | -0.96 | 0.014 * |
|    |                                             | 8 h          | 2.0(0.74)                                                                                                                                                                                                                                       | -0.43 | 0.001 * |
|    |                                             | 12 h         | 1.83(1.02)                                                                                                                                                                                                                                      | -0.26 | 0.001 * |
|    |                                             | 24 h         | 1.57(1.14)                                                                                                                                                                                                                                      |       | 0.001 * |
|    | Control (GA<br>only)                        | 30           | VNRS at Rest                                                                                                                                                                                                                                    |       |         |
|    |                                             | 1 h          | 6.03(1.52)                                                                                                                                                                                                                                      | -3.93 | 0.001 * |
|    |                                             | 2 h          | 4.50(1.71)                                                                                                                                                                                                                                      | -2.4  | 0.001 * |
|    |                                             | 4 h          | 2.80(1.19)                                                                                                                                                                                                                                      | -0.7  | 0.001 * |
|    |                                             | 8 h          | 2.60(1.13)                                                                                                                                                                                                                                      | -0.5  | 0.002 * |
|    |                                             | 12 h         | 2.17(1.02)                                                                                                                                                                                                                                      | -0.07 | 0.009 * |
|    |                                             | 24 h         | 2.10(1.09)                                                                                                                                                                                                                                      |       | 0.001 * |
|    |                                             | VNRS (Cough) |                                                                                                                                                                                                                                                 |       |         |
|    |                                             | 1 h          | 6.33(1.81)                                                                                                                                                                                                                                      | -3.26 | 0.001 * |
|    |                                             | 2 h          | 3.33(1.69)                                                                                                                                                                                                                                      | -0.26 | 0.001 * |
|    |                                             | 4 h          | 3.63(1.59)                                                                                                                                                                                                                                      | -0.56 | 0.014 * |
|    |                                             | 8 h          | 3.57(1.46)                                                                                                                                                                                                                                      | -0.5  | 0.001 * |
|    |                                             | 12 h         | 3.13(1.51)                                                                                                                                                                                                                                      | -0.06 | 0.001 * |
|    |                                             | 24 h         | 3.07(1.70)                                                                                                                                                                                                                                      |       | 0.001 * |
| 47 | Paudel [101]                                |              |                                                                                                                                                                                                                                                 |       |         |
|    | US-TAP Block                                | 30           | US-TAP Block and local infiltration had significantly different postoperative pain scores (VAS) at 0, 2, 6, 12, and 24 h. The VAS score is significantly higher in the local infiltration group than in the US-TAP block group ( $p < 0.001$ ). |       |         |
|    |                                             | 24 h         | 24.67(24.17)                                                                                                                                                                                                                                    |       | 0.001 * |
|    |                                             |              | 3.45(1.12)                                                                                                                                                                                                                                      |       | 0.001 * |
|    | Control (port site<br>infiltration)         | 30           | US-TAP Block and local infiltration had significantly different postoperative pain scores (VAS) at 0, 2, 6, 12, and 24 h. The VAS score is significantly higher in the local infiltration group than in the US-TAP block group ( $p < 0.001$ ). |       |         |
|    |                                             | 24 h         | 3.45(1.12)                                                                                                                                                                                                                                      |       | 0.001 * |
|    |                                             |              | 1.75(0.70)                                                                                                                                                                                                                                      |       | 0.001 * |
| 48 | Rahimzadeh<br>[102]                         | 2022         |                                                                                                                                                                                                                                                 |       |         |
|    | US-TAP Block<br>(post-surgery)              | 38           |                                                                                                                                                                                                                                                 |       |         |
|    |                                             |              | 34.21(3.64)                                                                                                                                                                                                                                     |       | 0.518   |
|    |                                             |              | 2.22(1.20)                                                                                                                                                                                                                                      |       | 0.089   |
|    | US-TAP Block<br>(after induction)           | 38           |                                                                                                                                                                                                                                                 |       |         |
|    |                                             |              | 32.11(2.67)                                                                                                                                                                                                                                     |       | 0.581   |
|    |                                             |              | 5.80(2.68)                                                                                                                                                                                                                                      |       | 0.089   |

Time = Time after the surgical operation; GA = General Anaesthesia; IV = Intravenously; IQR = Interquartile Range; LAI-Group = received pre-operational administration of 0.5% Ropivacaine plus 1mcg of Dexamethasone at the trocar entrance; TL-Group = received pre-operational administration of 0.5% Ropivacaine plus

1mcg of Dexamethasone at the trocar entrance alongside posterior US-TAP block; TR-Group = US-TAP block combined with rectus sheath block; BD-TAP = bilateral dual transversus abdominis plane; VNRS = Verbal Numerical Rating Scale; PCA = Patient Controlled Analgesia; IV-PCA = Intravenous Patient Controlled Analgesia; PCIA = Patient Controlled Intravenous Analgesia; NAS = Numeric Analogue Scale; VAS = Visual Analog Scale; NR = Not Reported; NRS = Numerical Rating Scale; US-OSTAP = Ultrasound-guided oblique subcostal transversus abdominis plane; TAP block = transversus abdominis plane block; OSTAP = oblique subcostal transversus abdominis; US-STA = Subcostal Ultrasound Transversus Abdominis; Subcostal Transversus Abdominis; US-Posterior TAP = Ultrasound guided posterior transversus abdominis plane block; Subcostal TAP block: subcostal transversus abdominis plane block; US-ESP = Ultrasound-guided erector spinae plane; US-STA Block = Ultrasound Guided Subcostal Transversus Abdominis; LAP-TAP = Laparoscopic transversus abdominis plane; US-TAPB = Ultrasound-guided transversus abdominis plane block; RSB = Rectus Sheath Block; LAI = Local Anaesthetic Infiltration; TAPB = transversus abdominis plane block; IPLA = Intraperitoneal Local Anaesthetic Injection; Modified BRILMA Block = Blocking the Branches of Intercostal nerves at the Level of Mid-Axillary line; LSTAP = Laparoscopic Subcostal TA; \* *p*-value less than 0.05.
